# Supplementary material
Source: HighWire-hosted journal article supplement (https://bmjophth.bmj.com/content/10/1/e002131)

A: Rater 1

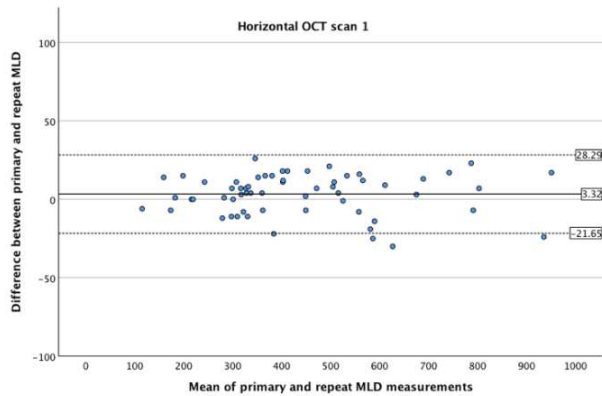

B: Rater 2

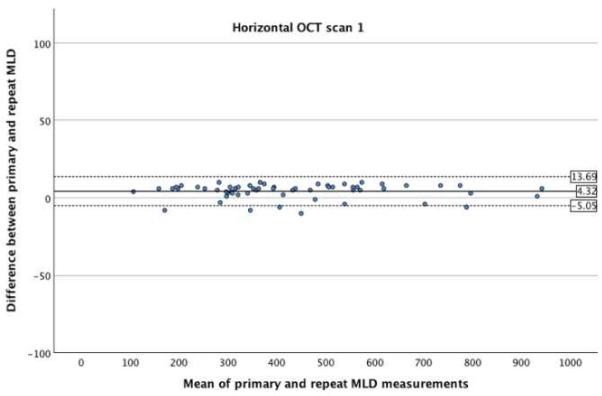

C: Rater 3

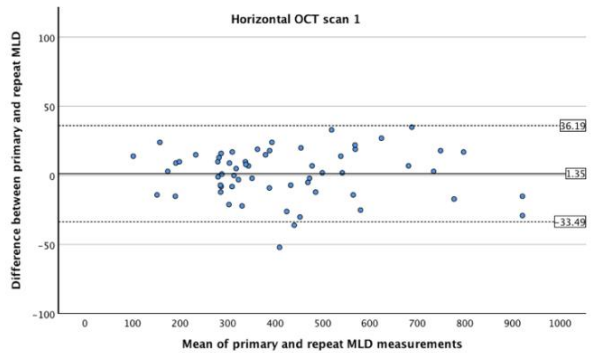

D: Rater 4

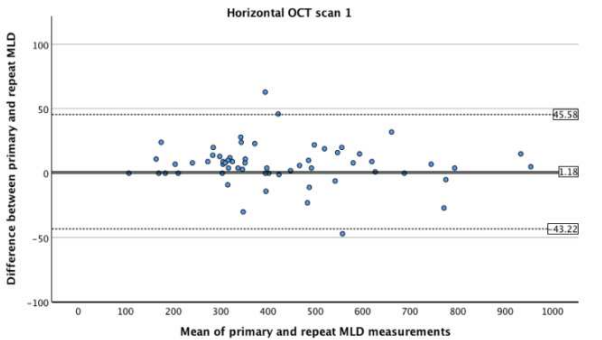

E: Rater 5

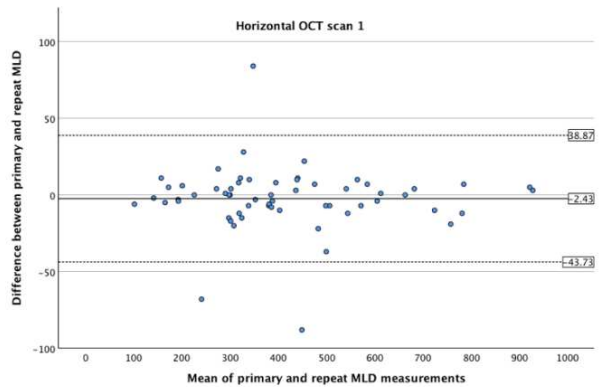

F: Rater 1

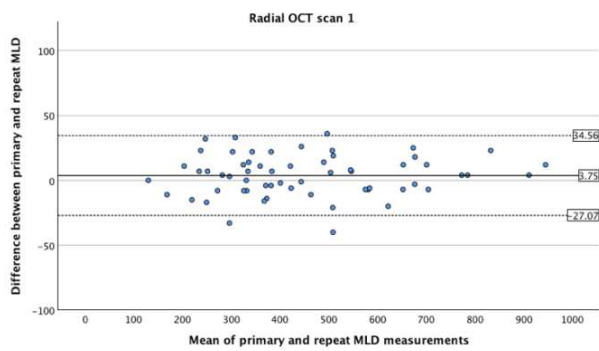

G: Rater 2

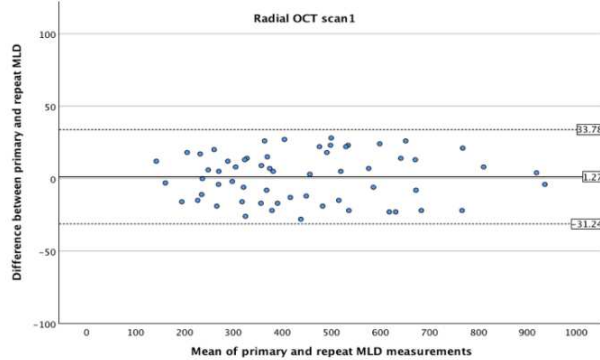

H: Rater 3

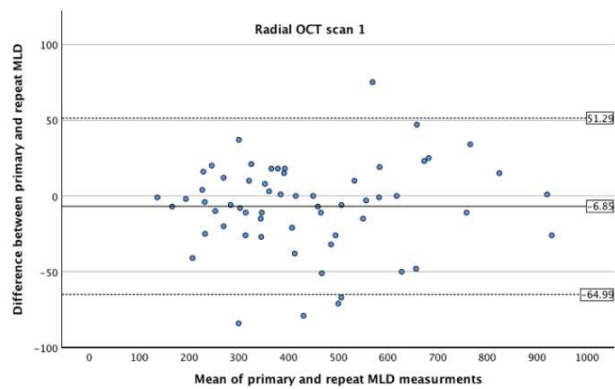

I: Rater 4

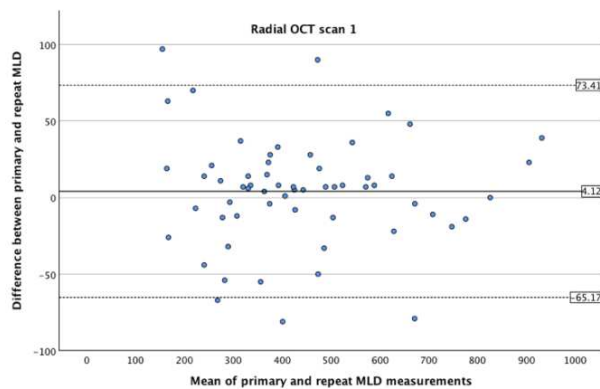

J: Rater 5

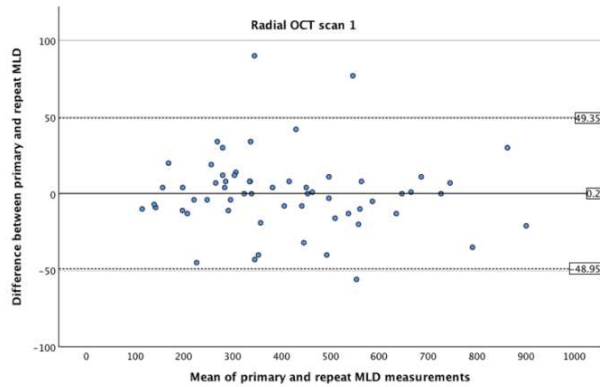

K: Rater 1

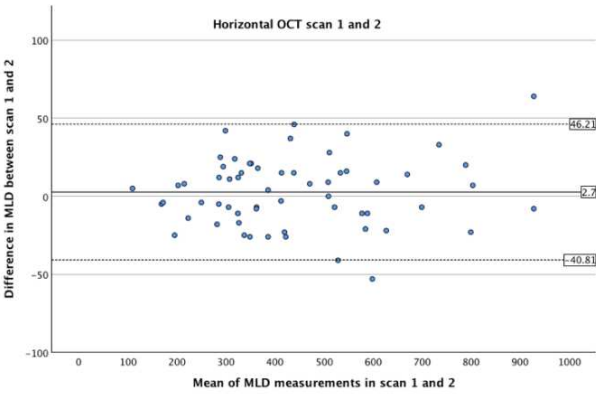

L: Rater 2

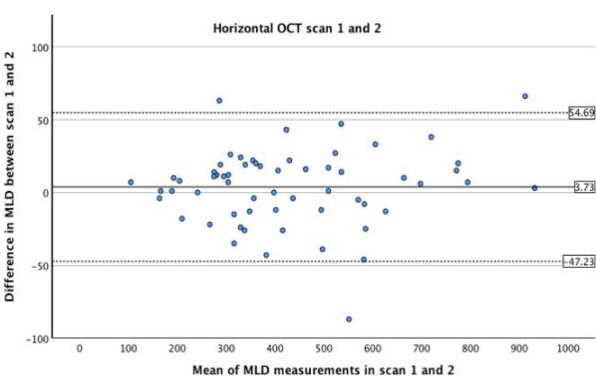

M: Rater 3

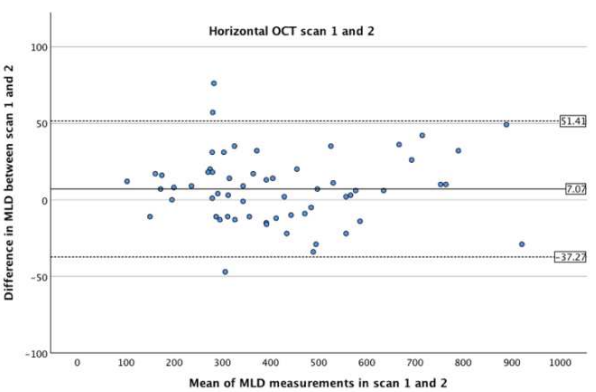

N: Rater 4

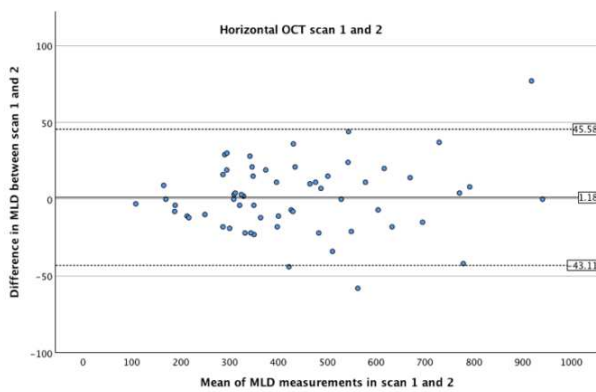

O: Rater 5

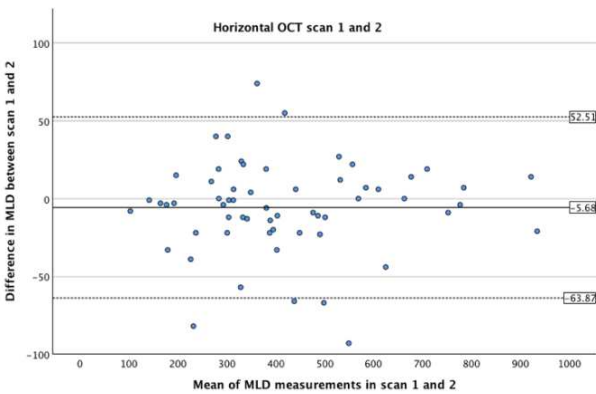

P: Rater 1

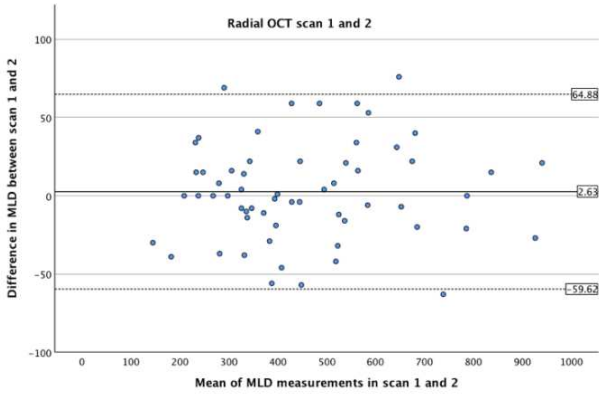

Q: Rater 2

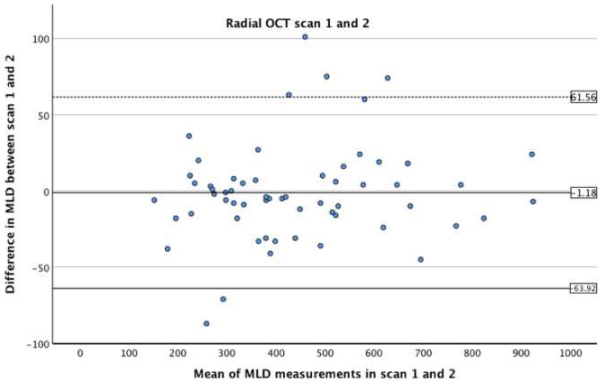

R: Rater 3

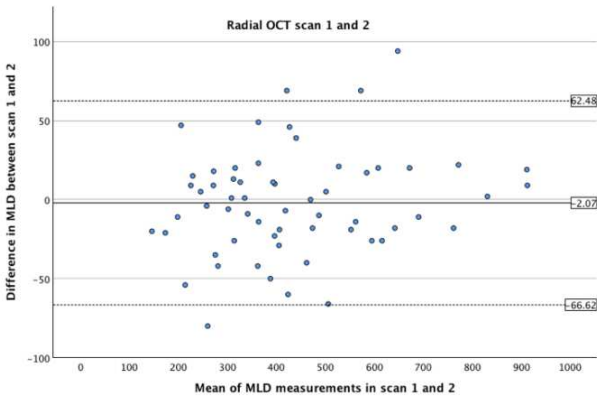

S: Rater 4

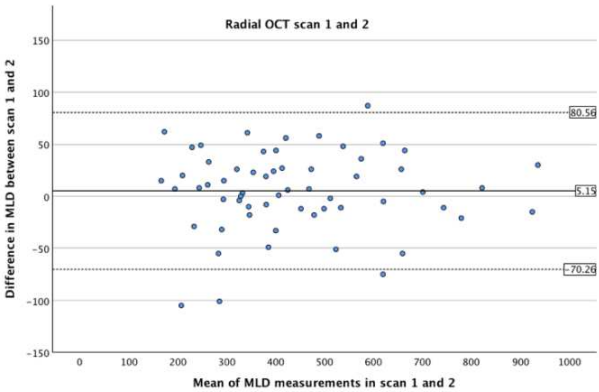

T: Rater 5

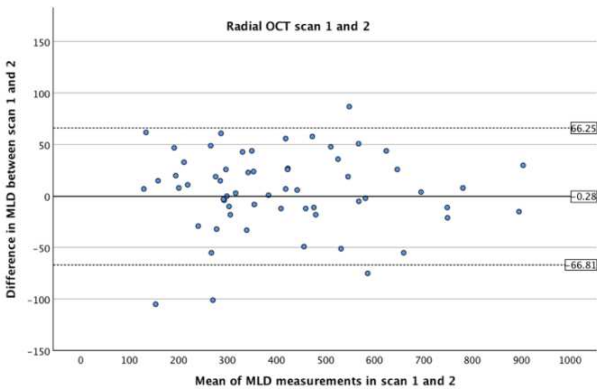

Supplement: inline-supplementary-material-1 [file inline-supplementary-material-1.pdf]
